# Supplementary material for: The type 4 metallothionein from Brassica napus seeds folds in a metal-dependent fashion and favours zinc over other metals
Source: Royal Society of Chemistry journal article supplement (doi:10.1039/c8mt00161h), 2018-09-03
Supplement: c8mt00161h1.pdf [file c8mt00161h1.pdf]

**The type 4 metallothionein from *Brassica napus* seeds folds in a metal-dependent fashion  
and favours zinc over other metals**

Agnieszka Mierek-Adamska<sup>ab</sup>, Grażyna B. Dąbrowska<sup>a</sup>, Claudia A. Blindauer<sup>\*b</sup>

<sup>a</sup> Department of Genetics, Faculty of Biology and Environmental Protection, Nicolaus Copernicus University, Lwowska 1, 87-100 Toruń, Poland

<sup>b</sup> Department of Chemistry, University of Warwick, Coventry CV4 7AL, UK

\*Claudia A. Blindauer

e-mail: C.Blindauer@warwick.ac.uk

tel. +44 (0)2476 528264

## Supplementary Information

```

-1510 TATTTTAAATATTATTAGTTTATTTTCGTTATTAATAACCTATTATAAGTTTGTATTTTATTTTAGATTTAAA
-1435 AAATGAATTTAAGATAATTTTAAATATTCTTAAACACTCGTATTTGCCATATCAATACTATGTACAAAATGAC
                                         CuRE   Skn-1
-1360 ATTTTACACGGAAAAATGATATTCAAATATGTATATGATATATGGTGTAAAGTTTGTATTGAAAATCT
      HMRE-forward border
-1285 GCATAATAITTGAATTATCTATTTTGAATATTGAAACATAGATTTTATGAAAATAATATTTTCATGTGTTGTAA
      HMRE-reverse border
-1210 TTTATTTATGGTTCATAATATATTTTACTTAGAATATTTATATTAATTTAAAGTTAACATATCTTTTATATAC
-1135 ATATATATGCTCATTACTTATAGATCCATTTAGGTGTATCAATAGGCTCAAAACCAAATACTTAAATGCGATTA
-1060 ATGAATTTTATTAATTCCTTGTAATAAATAGGAGTATTTTGAAAAAATGTAACTTTCATTAAGAGTATAATTTG
-985 GGAATGATCTGGTATTGATTACCGTTAAATTAGTCTAGGATGTTGAACCGAACCAACCCGCTAAACCAAGAT
-910 TTTGGTGAGAAGTTTGGTTCGATTTGGCAGGTTTATTTAAAAATCTGGTTTTTCAGTTCAATTAGGTAAACGTTAG
-835 TTTTCAGTAAAATTACCTGAAATCACCCGAGTTTAAACCGAATTTTAAACCAAATATAATCAAACCTAAAAACGGT
-760 TAATTTAGGTAAAAATTAATAAATATCCAAAATACCGAACCAACCAACATTTTTCCAGTTTTTTTATGCGA
-685 GATTTTGGTTAAACCTAACTACCCGAATGCCGAACCTACCTACCCGACTACCCTAACCATTTGCCGAATTTAAATC
-610 AATCATATTAGCTTATTAATTTGGGCTTAACATAAATATACAAAACATCTTACCTTTTAATTAAGATCATAAA
-535 AATGGTCCAATGTATTTAAACATAAATCAACTAATAATCTGGTTTGGCATAATGGTTGAGCATATGGTTAGATA
-460 TGATTTGAAACTGGGTGTGATGTCCACTATCTATAGATTTTGTAGAATGAATTTTTTATTTTTTATTAATTAA
-385 TTAATAATGTAGATGTCATGTCAGTGTATCATTTGAATAATGGAGATACGTCAATGTATGTATAAACATAAATAT
      Skn-1                               MeJA-RE
-310 TTTTGTAGTGTATAAAATTTAAATATATTTTGTGATATATGTTTTAACATATGATTCGTGTGTTTAGCACTGAT
-235 TCGGACCGCGACTCTTTATTGATGTATGAATTGGCCAATCTTTT TTTGTGATGGTGTGTTACGTAGCACA
                                         SA-RE
-160 TTTGAACTCATGAAGCTTCGTCAACAATCAAGTGAGACGAGAAGCTACCACATGGCACATGCTACCCAACATAGA
      MeJA-RE
-85  GCCACGTGCACGGCCCATCGTCTATATCTATATATGATCATGTGAAAGACGGGAGTAGAAGAAAAGAGAAA
      ABRE                               5'UTR Py-rich stretch
-14  GCGAGGTAAAAGAAATG
  
```

**Fig. S1** The sequence of the putative promoter region of BnMT4 derived from NCBI database (acc. no. LOC10638850). The putative start codon is underlined. The following potential *cis*-elements were identified using the PlantCARE (<http://bioinformatics.psb.ugent.be/webtools/plant-care/html/>) (Lescot *et al.*, 2002) database: ABRE (abscisic acid response element), MeJA-RE (methyl jasmonate response element), SA-RE (salicylic acid response element), Skn-1 (element responsible for endosperm specific expression), 5'UTR Py-rich stretch (pyrimidine rich stretch responsible for conferring high level of transcription), CAAT and TATA boxes.

Additional putative metal response elements were identified manually: CuRE (copper response element) (Quinn and Merchant, 1995), HMRE (high metal responsive element) (Qi *et al.*, 2007; Ren and Zhao, 2009).

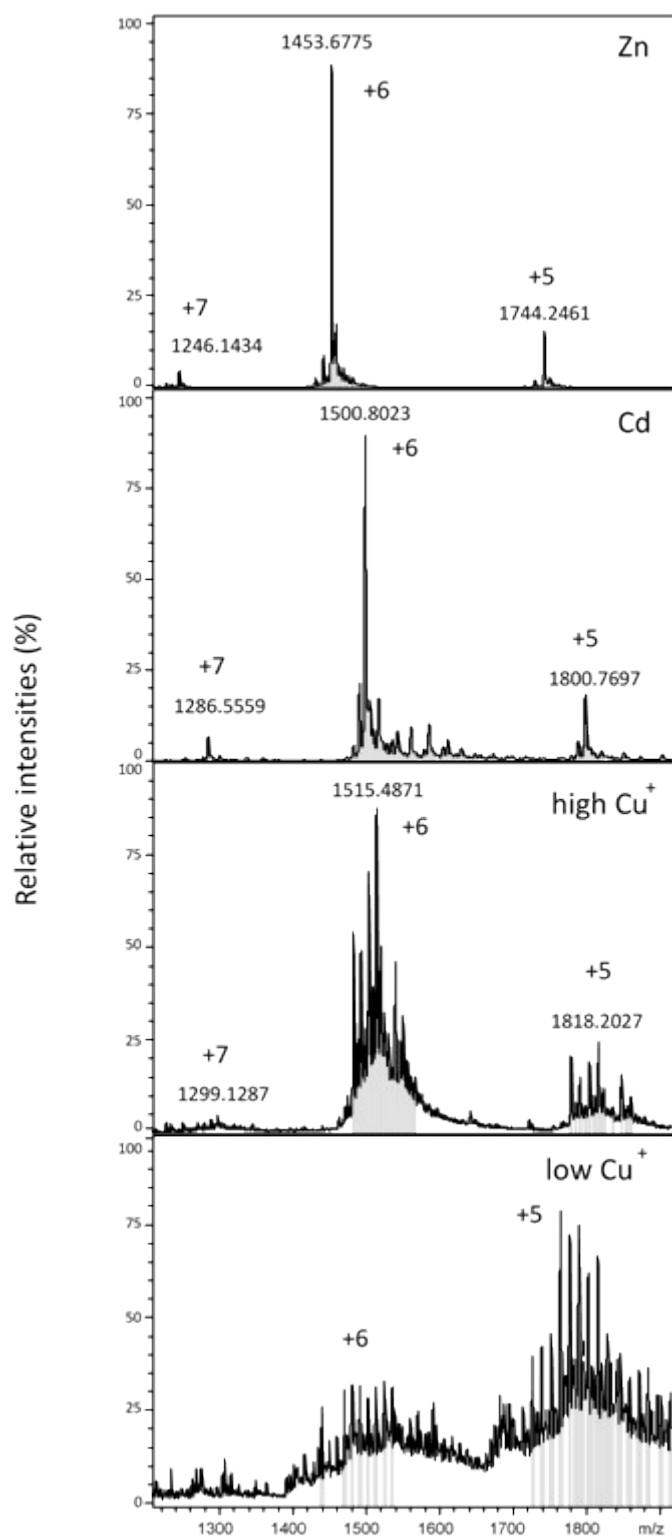

Fig. S2 Raw ESI mass spectra of Zn(II)-, Cd(II)- and Cu(I)-BnMT4 complexes at native pH (10 mM  $\text{NH}_4\text{HCO}_3$ , 10% MeOH).

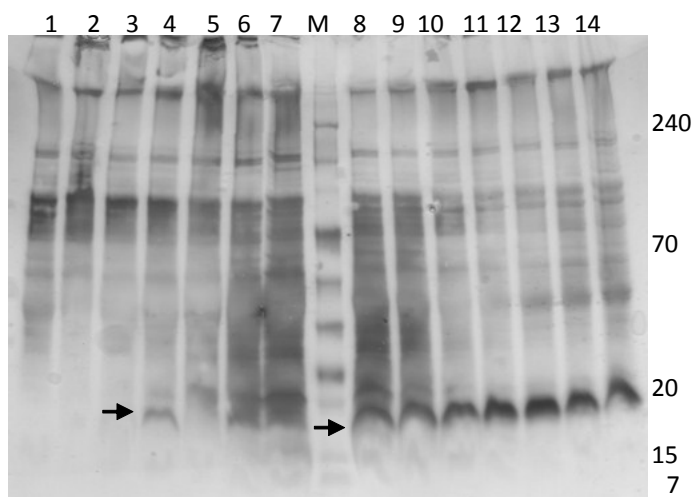

**Fig. S3** SDS-PAGE analysis of crude cell lysate of *E. coli* BL21 cells transformed with pET-BnMT4 construct, grown in medium containing 0.5 mM ZnSO<sub>4</sub> without (1-7) or with (8-14) IPTG. Cells were harvested every hour for seven hours and proteins were isolated as described in materials and methods. Arrows indicate the positions of BnMT4 protein. M – Perfect Colour Protein Ladder (Eurx, Gdańsk, Poland).

**Table S1.** Calculated and experimental masses of species observed in +6 charge state ESI-MS for Zn- and Cd-BnMT4 at native and acidic pH.

|                               | Species                                | Calculated MW | Experimental MW |
|-------------------------------|----------------------------------------|---------------|-----------------|
| <b>Zn-BnMT4<br/>native pH</b> | Zn <sub>6</sub> -BnMT4                 | 8717.35       | 8716.11         |
|                               | Zn <sub>5</sub> -BnMT4                 | 8653.85       | 8650.39         |
|                               | Zn <sub>4</sub> -BnMT4                 | 8590.35       | 8585.71         |
| <b>Cd-BnMT4<br/>native pH</b> | Cd <sub>8</sub> -BnMT4                 | 9219.55       | 9218.97         |
|                               | Cd <sub>7</sub> -BnMT4                 | 9109.15       | 9109.37         |
|                               | Cd <sub>6</sub> -BnMT4                 | 8998.75       | 8998.80         |
|                               | Cd <sub>5</sub> Zn <sub>1</sub> -BnMT4 | 8951.85       | 8951.86         |
| <b>Zn-BnMT4<br/>acidic pH</b> | Apo form                               | 8336.35       | 8336.10         |
|                               | Zn <sub>1</sub> -BnMT4                 | 8399.85       | 8399.00         |
| <b>Cd-BnMT4<br/>acidic pH</b> | Apo form                               | 8336.35       | 8336.34         |
|                               | Cd <sub>1</sub> -BnMT4                 | 8446.75       | 8442.06         |
|                               | Cd <sub>2</sub> -BnMT4                 | 8557.15       | 8556.90         |
|                               | Cd <sub>3</sub> -BnMT4                 | 8667.55       | 8667.30         |
|                               | Cd <sub>4</sub> -BnMT4                 | 8777.95       | 8778.06         |
|                               | Cd <sub>5</sub> -BnMT4                 | 8888.35       | 8888.52         |

**Table S2.** Calculated and experimental masses of species observed in +6 charge state ESI-MS for Cu-BnMT4 at neutral and acidic pH. The calculated molecular weights refer to the pure Cu<sup>+</sup>-bound species.

|                                                           | Species                 | Calculated MW | Experimental MW | Cal. MW-Exp. MW |
|-----------------------------------------------------------|-------------------------|---------------|-----------------|-----------------|
| <b>Cu-BnMT4</b><br>normal aeration<br>level<br>native pH  | Me <sub>5</sub> -BnMT4  | 8648.85       | 8638.90         | 9.95            |
|                                                           | Me <sub>8</sub> -BnMT4  | 8836.35       | 8826.86         | 9.49            |
|                                                           | Me <sub>9</sub> -BnMT4  | 8898.85       | 8889.99         | 8.86            |
|                                                           | Me <sub>10</sub> -BnMT4 | 8961.35       | 8953.64         | 7.71            |
|                                                           | Me <sub>11</sub> -BnMT4 | 9023.85       | 9016.87         | 6.98            |
|                                                           | Me <sub>12</sub> -BnMT4 | 9086.35       | 9081.64         | 4.71            |
|                                                           | Me <sub>13</sub> -BnMT4 | 9148.85       | 9145.56         | 3.29            |
|                                                           | Me <sub>14</sub> -BnMT4 | 9211.35       | 9214.28         | -2.93           |
| <b>Cu-BnMT4</b><br>reduced aeration<br>level<br>native pH | Me <sub>9</sub> -BnMT4  | 8898.85       | 8896.08         | 2.77            |
|                                                           | Me <sub>10</sub> -BnMT4 | 8961.35       | 8959.62         | 1.73            |
|                                                           | Me <sub>11</sub> -BnMT4 | 9023.85       | 9022.14         | 1.71            |
|                                                           | Me <sub>12</sub> -BnMT4 | 9086.35       | 9085.86         | 0.49            |
|                                                           | Me <sub>13</sub> -BnMT4 | 9148.85       | 9149.28         | -0.43           |
| <b>Cu-BnMT4</b><br>acidic pH                              | Cu <sub>8</sub> -BnMT4  | 8836.35       | 8832.36         | 3.99            |
|                                                           | Cu <sub>9</sub> -BnMT4  | 8898.85       | 8896.08         | 2.77            |
|                                                           | Cu <sub>10</sub> -BnMT4 | 8961.35       | 8959.62         | 1.73            |
|                                                           | Cu <sub>11</sub> -BnMT4 | 9023.85       | 9022.14         | 1.71            |
|                                                           | Cu <sub>12</sub> -BnMT4 | 9086.35       | 9085.86         | 0.49            |

**Table S3.** Calculated and experimental masses of species observed in ESI-MS for Zn-BnMT4 at different values of pH. Predominant species at particular pH is marked in bold.

|         | Species                     | Calculated MW  | Experimental MW |
|---------|-----------------------------|----------------|-----------------|
| pH 7.27 | <b>Zn<sub>6</sub>-BnMT4</b> | <b>8717.35</b> | <b>8716.11</b>  |
|         | Zn <sub>5</sub> -BnMT4      | 8653.85        | 8650.39         |
|         | Zn <sub>4</sub> -BnMT4      | 8590.35        | 8585.71         |
| pH 5.05 | <b>Zn<sub>6</sub>-BnMT4</b> | <b>8717.35</b> | <b>8715.59</b>  |
|         | Zn <sub>5</sub> -BnMT4      | 8653.85        | 8652.37         |
|         | Zn <sub>4</sub> -BnMT4      | 8590.35        | 8588.27         |
|         | Zn <sub>3</sub> -BnMT4      | 8526.85        | 8524.24         |
| pH 4.48 | Zn <sub>6</sub> -BnMT4      | 8717.35        | 8716.33         |
|         | Zn <sub>5</sub> -BnMT4      | 8653.85        | 8653.03         |
|         | <b>Zn<sub>4</sub>-BnMT4</b> | <b>8590.35</b> | <b>8589.61</b>  |
|         | Zn <sub>3</sub> -BnMT4      | 8526.85        | 8526.08         |
|         | Zn <sub>2</sub> -BnMT4      | 8463.35        | 8462.87         |
| pH 4.14 | Zn <sub>6</sub> -BnMT4      | 8717.35        | 8715.44         |
|         | Zn <sub>5</sub> -BnMT4      | 8653.85        | 8652.58         |
|         | Zn <sub>4</sub> -BnMT4      | 8590.35        | 8589.44         |
|         | Zn <sub>3</sub> -BnMT4      | 8526.85        | 8526.10         |
|         | Zn <sub>2</sub> -BnMT4      | 8463.35        | 8463.04         |
|         | Zn <sub>1</sub> -BnMT4      | 8399.85        | 8300.43         |
|         | <b>Apo form</b>             | <b>8336.35</b> | <b>8336.43</b>  |
| pH 3.50 | Zn <sub>1</sub> -BnMT4      | 8399.85        | 8399.22         |
|         | <b>Apo form</b>             | <b>8336.35</b> | <b>8336.16</b>  |

**Table S4.** Calculated and experimental masses of species observed in ESI-MS for Cd-BnMT4 at different values of pH. Predominant species at particular pH is marked in bold.

|         | Species                                | Calculated MW  | Experimental MW |
|---------|----------------------------------------|----------------|-----------------|
| pH 6.61 | Cd <sub>7</sub> -BnMT4                 | 9109.15        | 9109.28         |
|         | <b>Cd<sub>6</sub>-BnMT4</b>            | <b>8998.75</b> | <b>8999.04</b>  |
|         | Cd <sub>5</sub> Zn <sub>1</sub> -BnMT4 | 8951.85        | 8950.50         |
|         | Cd <sub>5</sub> -BnMT4                 | 8888.35        | 8888.53         |
| pH 5.40 | Cd <sub>7</sub> -BnMT4                 | 9109.15        | 9109.17         |
|         | <b>Cd<sub>6</sub>-BnMT4</b>            | <b>8998.75</b> | <b>8998.76</b>  |
|         | Cd <sub>5</sub> Zn <sub>1</sub> -BnMT4 | 8951.85        | 8951.46         |
|         | Cd <sub>5</sub> -BnMT4                 | 8888.35        | 8888.15         |
| pH 4.21 | Cd <sub>7</sub> -BnMT4                 | 9109.15        | 9109.14         |
|         | <b>Cd<sub>6</sub>-BnMT4</b>            | <b>8998.75</b> | <b>8998.86</b>  |
|         | Cd <sub>5</sub> -BnMT4                 | 8888.35        | 8888.46         |
| pH 3.76 | Cd <sub>6</sub> -BnMT4                 | 8998.75        | 8998.68         |
|         | <b>Cd<sub>5</sub>-BnMT4</b>            | <b>8888.35</b> | <b>8888.40</b>  |
|         | Cd <sub>4</sub> -BnMT4                 | 8777.95        | 8777.88         |
| pH 3.51 | Cd <sub>6</sub> -BnMT4                 | 8998.75        | 8999.15         |
|         | <b>Cd<sub>5</sub>-BnMT4</b>            | <b>8888.35</b> | <b>8888.92</b>  |
|         | Cd <sub>4</sub> -BnMT4                 | 8777.95        | 8778.00         |
| pH 3.06 | Cd <sub>6</sub> -BnMT4                 | 8998.75        | 8998.84         |
|         | Cd <sub>5</sub> -BnMT4                 | 8888.35        | 8888.56         |
|         | Cd <sub>4</sub> -BnMT4                 | 8777.95        | 8777.97         |
|         | Cd <sub>3</sub> -BnMT4                 | 8667.55        | 8667.38         |
|         | Cd <sub>2</sub> -BnMT4                 | 8557.15        | 8556.91         |
|         | Cd <sub>1</sub> -BnMT4                 | 8446.75        | 8446.71         |
|         | <b>Apo form</b>                        | <b>8336.35</b> | <b>8336.06</b>  |
